# Supplementary material for: Reduction of aromatic nitro compounds catalyzed by biogenic CuO nanoparticles
Source: Royal Society of Chemistry journal article supplement (doi:10.1039/c4ra10397a), 2014-10-10
Supplement: c4ra10397a1.pdf [file c4ra10397a1.pdf]

## Supporting information

### Reduction of aromatic nitro compounds catalysed by Biogenic CuO nanoparticles

**Chandan Tamuly<sup>a\*</sup>, Indranirekha Saikia<sup>a</sup>, Moushumi Hazarika<sup>a</sup>, and Manash R. Das<sup>b</sup>**

<sup>a</sup> CSIR-North East Institute of Science and Technology. Branch Itanagar Arunachal Pradesh-791110, India

<sup>b</sup> CSIR-North East Institute of Science and Technology. Jorhat, Assam-785006, India

Corresponding author: Telefax: +91360-2244220

e-mail: c.tamuly@gmail.com

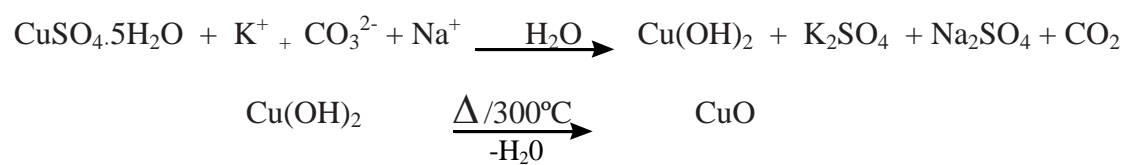

Scheme 1S: Plausible mechanism in synthesis of CuO nanoparticles by using peel of *Musa balbisiana*

## Scheme 2S. Spectroscopic analysis of isolated compounds

### 1) 3-chloroaniline

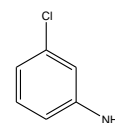

$^1\text{H NMR}$  ( $\text{CDCl}_3$ , 300 MHz)  $\delta$ : 7.08–7.03 (m, 1 H), 6.80–6.66 (m, 2H), 6.54–6.52 (m, 1H), 3.47 (s, 2H);

$^{13}\text{C NMR}$  ( $\text{CDCl}_3$ , 75 MHz)  $\delta$ : 147.6, 134.8, 130.3, 118.5, 114.9, 113.2

GC-MS ( $m/z$  %): 127.6 ( $\text{M}^+$ ).

### 2) 3-Methoxyaniline

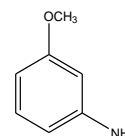

$^1\text{H NMR}$  ( $\text{CDCl}_3$ ):  $\delta$  7.07 (dd,  $J = 8.1$  Hz, 7.8 Hz, 1H); 6.33 (dd,  $J = 8.1$  Hz, 2.4 Hz, 1H); 6.30 (dd,  $J = 7.8$  Hz, 1.8 Hz, 1H); 6.25 (dd,  $J = 2.4$  Hz, 2.4 Hz, 1H); 3.77 (s, 3H); 3.66 (bs, 2H).

$^{13}\text{C NMR}$  ( $\text{CDCl}_3$ , 75 MHz)  $\delta$ : 160.7, 147.2, 130.2, 108.2, 104.4, 101.4, 55.1.

GC-MS( $m/z$ %):123 ( $\text{M}^+$ ).

### 3) 3-Bromoaniline

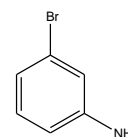

$^1\text{H NMR}$  (300 MHz,  $\text{CDCl}_3$ )  $\delta$ : 7.01–6.96 (t, 1H,  $J = 7.6$  Hz), 6.86–6.80 (t, 2H,  $J = 8.5$  Hz), 6.57 (d, 1H,  $J = 7.8$  Hz), 3.67 (br s, 2H).

$^{13}\text{C NMR}$  ( $\text{CDCl}_3$ , 75 MHz)  $\delta$ : 150.4, 131.9, 123.5, 121.3, 115.8, 115.3

GC-MS ( $m/z$ %):172 ( $\text{M}^+$ ).

### 4) 2-Chloro aniline

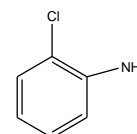

$^1\text{H NMR}$  (300 MHz,  $\text{CDCl}_3$ ):  $\delta$  7.15–7.30(m, 1H), 6.95–7.10(m, 1H), 6.57–6.75(m, 2H), 3.97(bs, 2H)

$^{13}\text{C NMR}$  (75 MHz,  $\text{CDCl}_3$ ):  $\delta$  142.6, 128.9, 127.2, 118.6, 118.5, 115.5,

GC-MS( $m/z$ %): 127.6 ( $\text{M}^+$ )

5) 3-Fluoroaniline

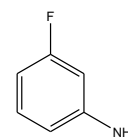

$^1\text{H NMR}$  (300 MHz,  $\text{CDCl}_3$ )  $\delta$ : 6.98 (t, 1H,  $J = 7.6$  Hz), 6.42-6.80 (t, 2H,  $J = 8.5$  Hz), 6.17 (d, 1H,  $J = 7.8$  Hz), 3.77 (br s, 2H).

$^{13}\text{C NMR}$  ( $\text{CDCl}_3$ , 75 MHz)  $\delta$ : 163.4, 149.9, 131.2, 111.6, 105.8, 104.3

GC-MS( $m/z\%$ ): 111 ( $\text{M}^+$ )

6) 4-Aminophenol

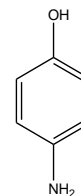

$^1\text{H NMR}$  (300 MHz,  $\text{DMSO-d}_6$ ):  $\delta$  8.95(bs, 1H), 6.31-6.39(m, 4H), 4.00(bs, 2H).

$^{13}\text{C NMR}$  (75 MHz,  $\text{DMSO-d}_6$ ):  $\delta$  148.2, 140.2, 115.4, 115.3.

GC-MS( $m/z\%$ ): 110 ( $\text{M+H}^+$ ).

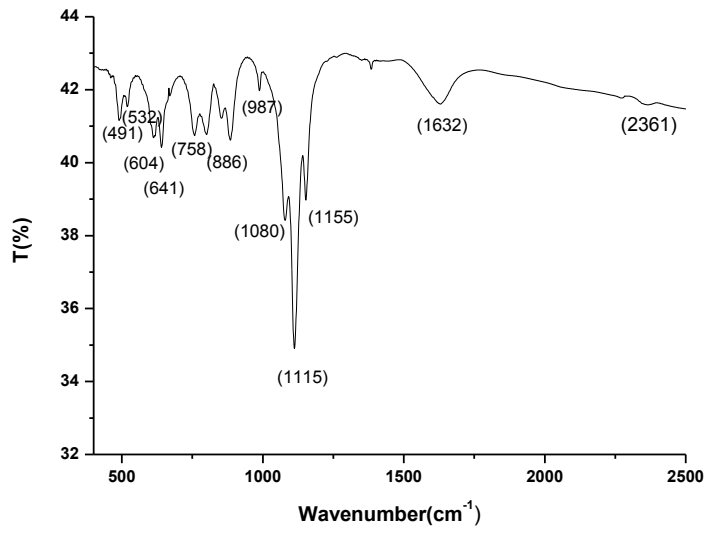

Figure1S: FT-IR spectra of CuO nanoparticles synthesised by *Musa balbisiana*

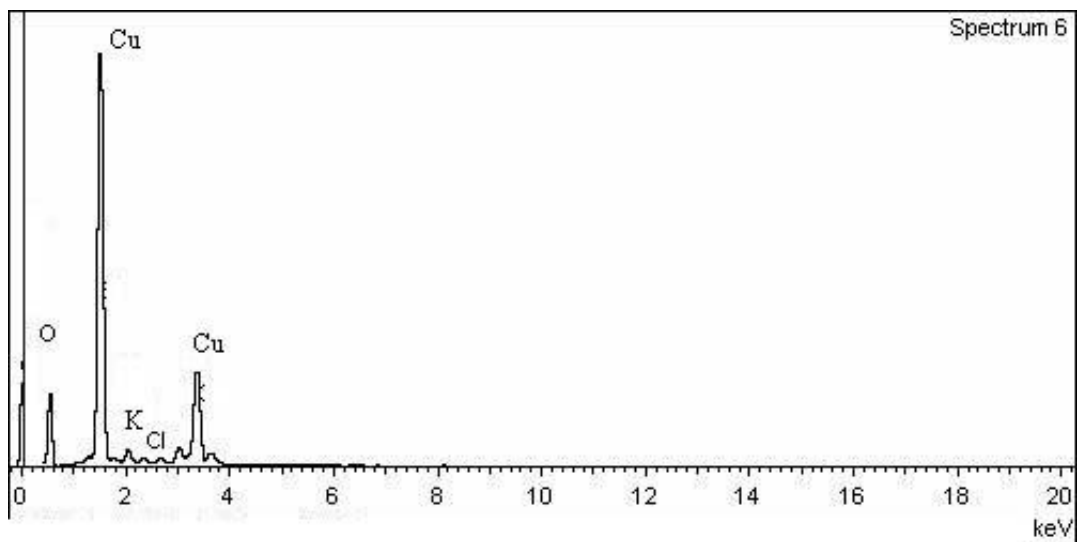

Figure 2S: EDX spectra of CuO nanoparticles.

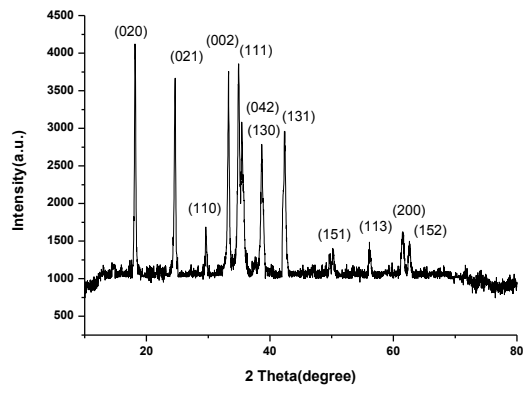

Figure 3S: XRD spectrum of CuO nanoparticles when synthesised by  $K_2CO_3$

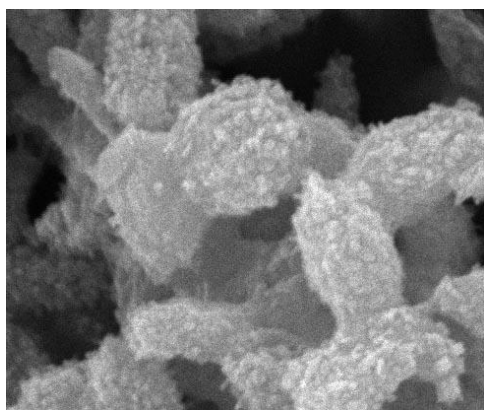

Figure 4S: SEM image of CuO nanoparticles when synthesized by  $K_2CO_3$



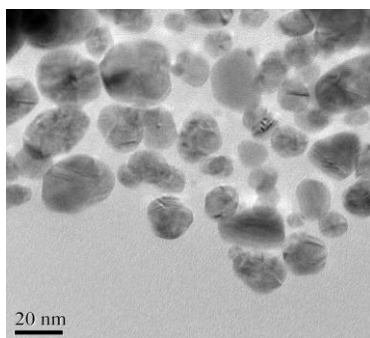

Figure 5S: TEM image of CuO nanoparticles when synthesized by  $K_2CO_3$

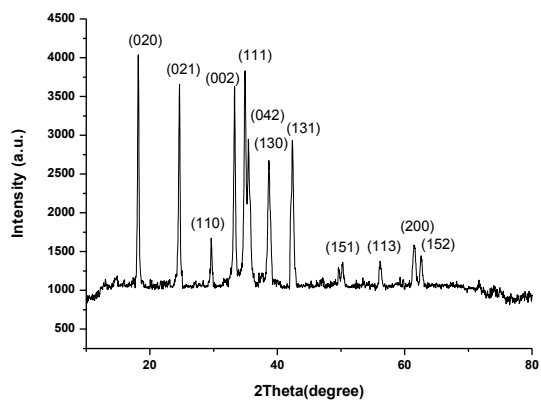

Figure 6S: XRD spectrum of CuO nanoparticles when synthesised by  $\text{Na}_2\text{CO}_3$

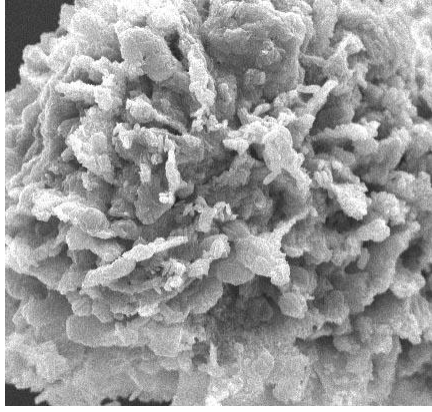

Figure 7S: SEM image of CuO nanoparticles when synthesized by  $\text{Na}_2\text{CO}_3$

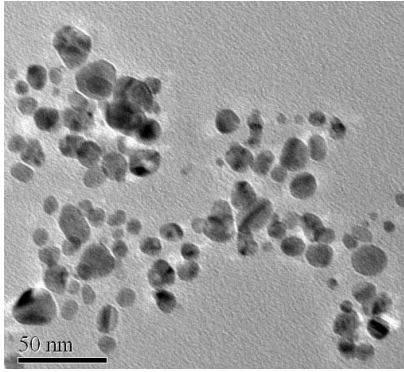

Figure 8S: TEM image of CuO nanoparticles when synthesized by  $\text{Na}_2\text{CO}_3$

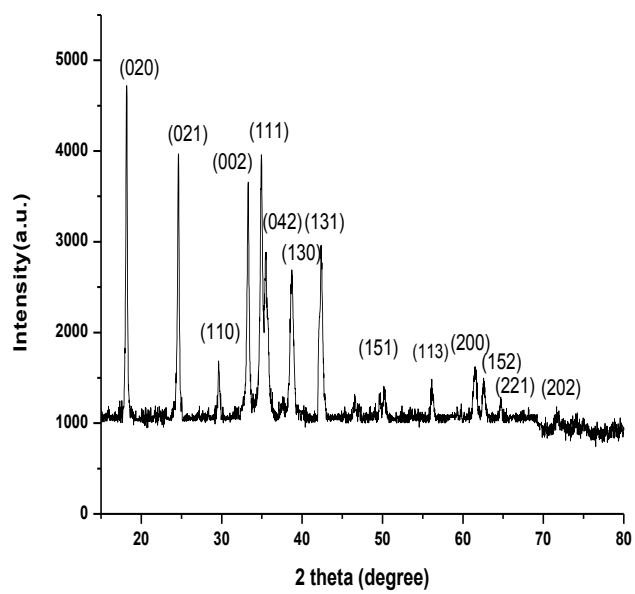

Figure 9S: XRD spectrum of CuO catalyst after 5 recycle

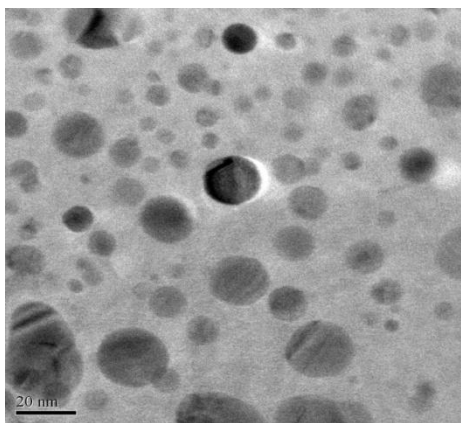

Figure 10S: TEM image after 5 recycle of CuO nanocatalyst

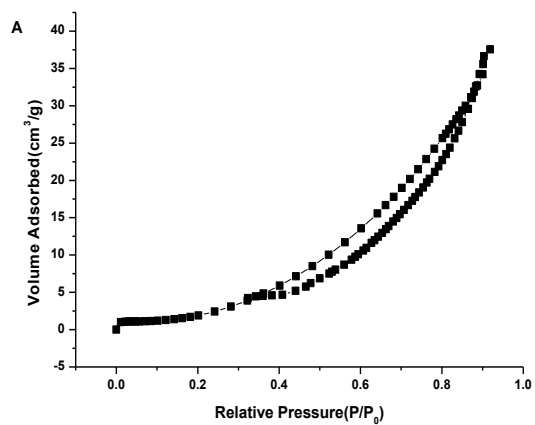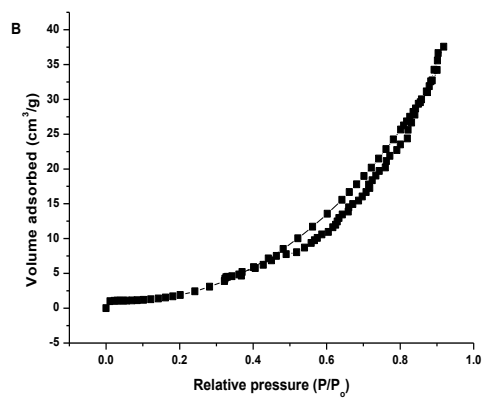

Figure 11S: The stacking pattern of N<sub>2</sub> adsorption desorption curves (A) fresh catalyst (B) after 5<sup>th</sup> cycle

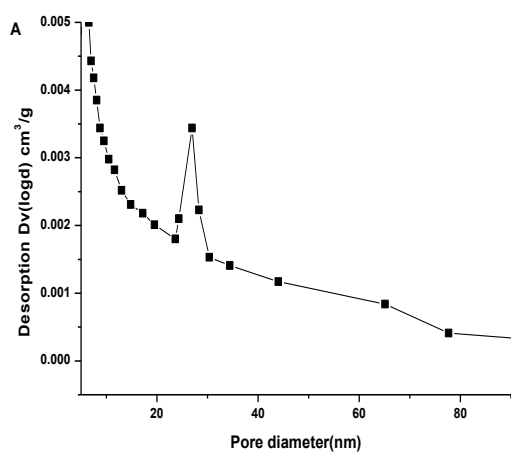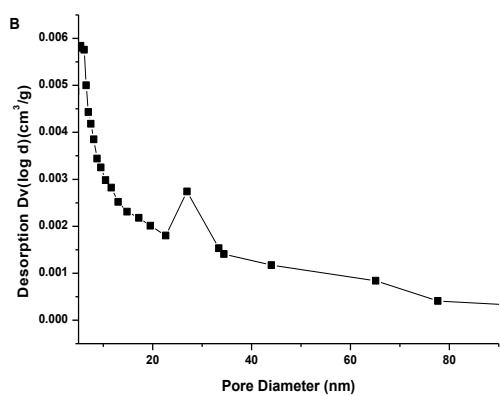

Figure 12S: BJH pore distribution curves of CuO nanoparticles (A) Fresh catalyst (B) After 5<sup>th</sup> cycle



Table 1S: The rate constant of catalytic reduction 4-nitrophenol to 4-aminophenol in presence CuO nanoparticles

| Conc. of nanoparticles (mol%) | Rate constant( $\text{min}^{-1}$ ) |        |
|-------------------------------|------------------------------------|--------|
|                               | CuO                                | $R^2$  |
| 0.02                          | 0.0781                             | 0.9856 |
| 0.04                          | 0.0811                             | 0.9484 |
| 0.06                          | 0.0825                             | 0.9723 |
| 0.08                          | 0.0850                             | 0.9910 |
| 0.10                          | 0.0885                             | 0.9941 |

Table 2S: CuO catalyzed reduction of aromatic nitro to amino compounds when prepared from commercial  $K_2CO_3$

| En-try | Substrate | Product | Time (hr) <sup>a</sup> | Yield (%) <sup>b</sup> | TOF (h <sup>-1</sup> ) <sup>c</sup> |
|--------|-----------|---------|------------------------|------------------------|-------------------------------------|
| 1      |           |         | 1.00                   | 95                     | 950                                 |
| 2      |           |         | 2.00                   | 82                     | 410                                 |
| 3      |           |         | 1.80                   | 80                     | 444                                 |
| 4      |           |         | 2.50                   | 80                     | 320                                 |
| 5      |           |         | 2.30                   | 74                     | 322                                 |
| 6      |           |         | 2.00                   | 75                     | 375                                 |

<sup>a</sup> Reactions performed at 30 °C and monitored using TLC until all the aromatic nitro compounds was found to have been consumed.

<sup>b</sup> Isolated yield after column chromatography of the crude product with 2% standard deviation.

<sup>c</sup> TOF: Turn Over frequency
